# Supplementary material for: The interaction between OsMADS57 and OsTB1 modulates rice tillering via DWARF14
Source: PubMed Central journal article supplement — Nat Commun. 2013 Mar 5;4:1566–. doi: 10.1038/ncomms2542 (PMC3615354; doi:10.1038/ncomms2542), 2013-03-05
Supplement: ncomms2542-s1.pdf [file ncomms2542-s1.pdf]

## Supplementary Information

The interaction between OsMADS57 and OsTB1 modulates rice tillering  
via *DWARF14*

Siyi Guo<sup>1,2,\*</sup>, Yunyuan Xu<sup>1,\*</sup>, Huanhuan Liu<sup>1,2</sup>, Zhiwei Mao<sup>1,2</sup>, Cui Zhang<sup>1</sup>, Yan Ma<sup>1</sup>, Qirui Zhang<sup>1</sup>, Zheng Meng<sup>1</sup>, Kang Chong<sup>1,3</sup>

<sup>1</sup>The Key Laboratory of Plant Molecular Physiology, Institute of Botany, Chinese Academy of Sciences, Beijing 100093, China

<sup>2</sup>University of Chinese Academy of Sciences, Beijing 100049, China

<sup>3</sup>National Center for Plant Gene Research, Beijing 100093, China

\* These authors contributed equally to this work.

Correspondence and requests for materials should be addressed to K.C. (email: chongk@ibcas.ac.cn).

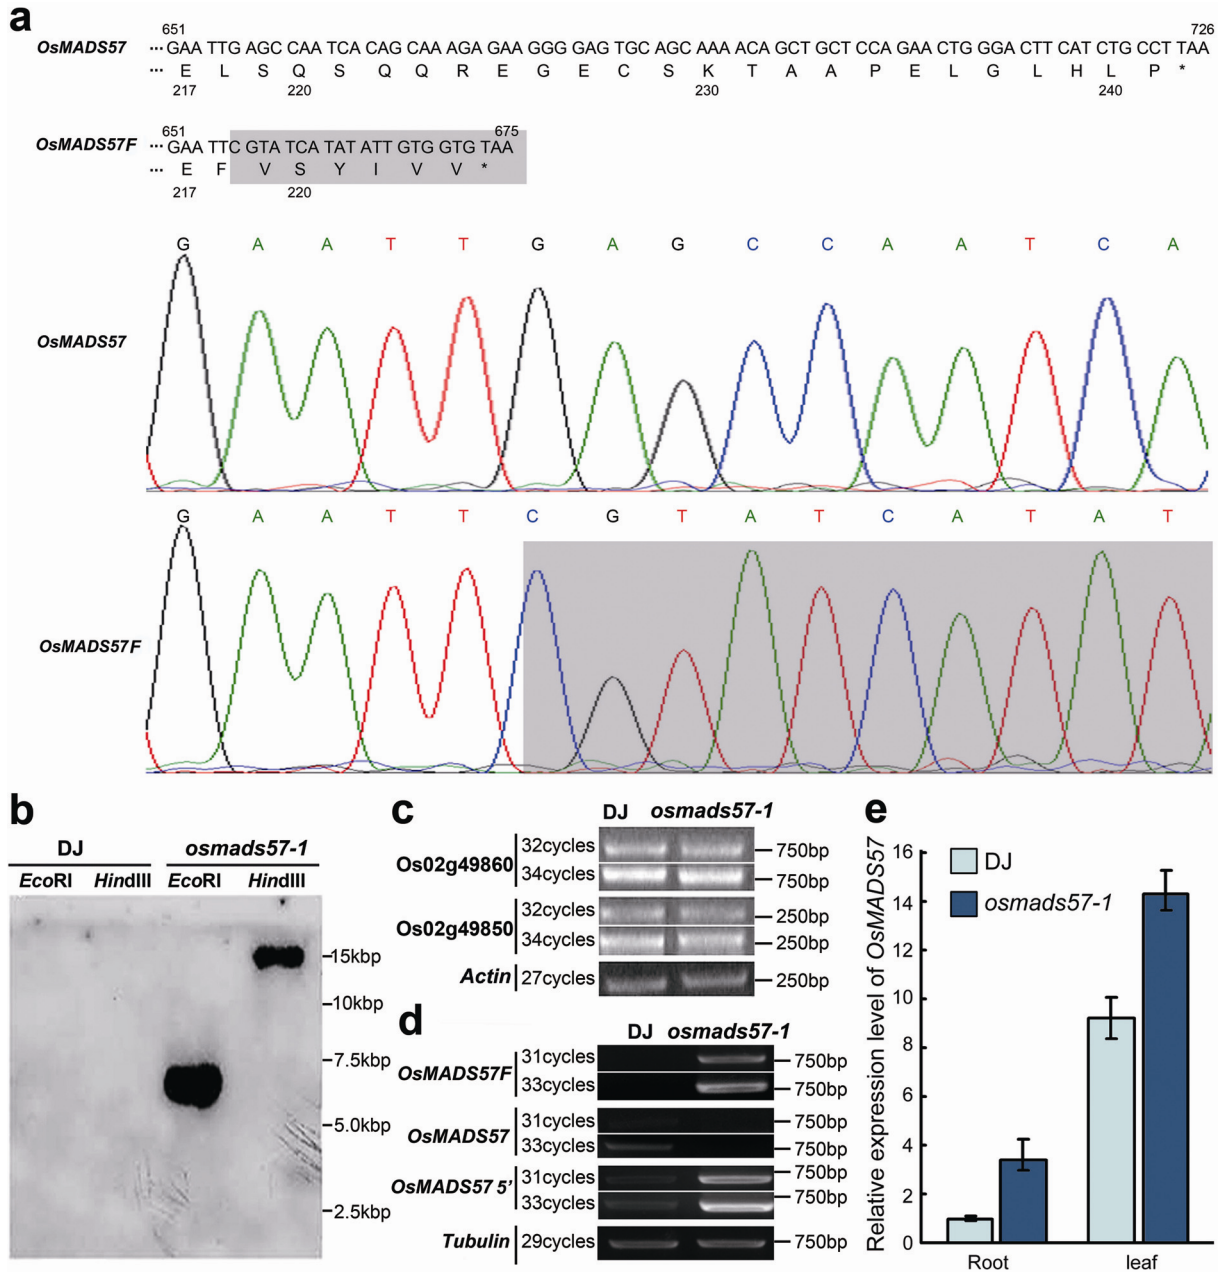

**Supplementary Figure S1. Molecular identification of the *osmads57-1* mutant.** (a) Sequencing result and the different amino acids of OsMADS57 and OsMADS57F. The shadow part indicated the sequence from T-DNA in *osmads57-1*. OsMADS57F, the fusion protein in which 7 amino acids encoded by the sequence from T-DNA fused to the C terminal 217-amino acids of OsMADS57. (b) Southern blot assay of *osmads57-1* mutant. Genomic DNA isolated from wild type DJ and *osmads57-1* mutant plants were digested with *EcoR* I or *Hind* III. The blot was hybridized with the open reading frame of the *GUS* gene labeled with [ $\alpha$ - $^{32}$ P] dCTP. *GUS* was present in the T-DNA vector. (c) RT-PCR analysis of the neighboring genes Os02g49850 and Os02g49860 in DJ and *osmads57-1*. (d) RT-PCR analysis of different region of *OsMADS57*. *OsMADS57*, the full length of *OsMADS57* cDNA; *OsMADS57F*, the recombinant *OsMADS57* cDNA; *OsMADS57 5'*, the 5' -fragment upstream the T-DNA insertion position. (e) The transcriptional level of *OsMADS57* in DJ and *osmads57-1* detected by qRT-PCR.

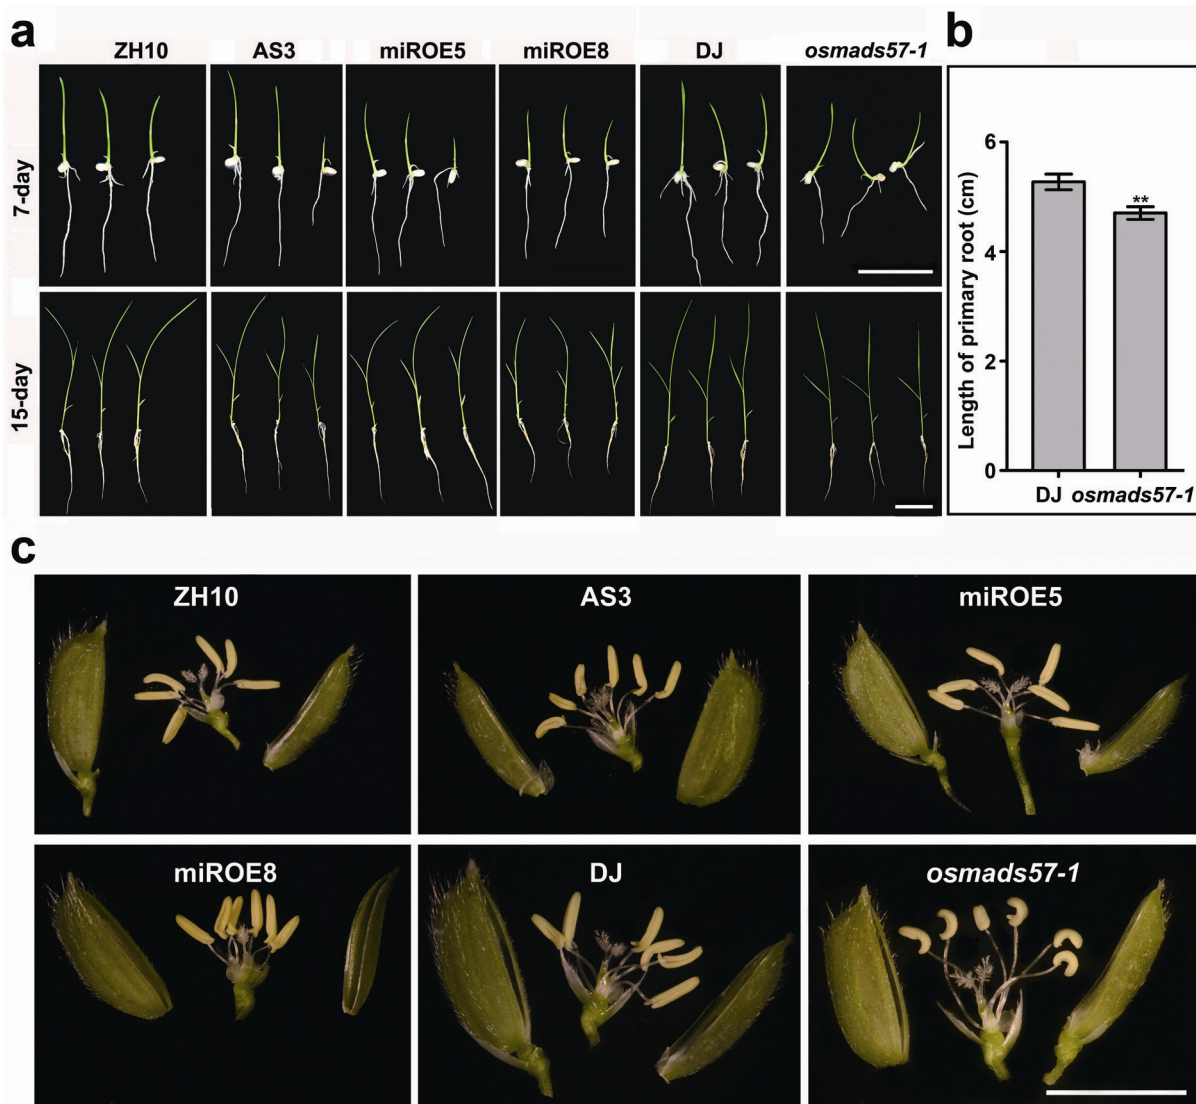

**Supplementary Figure S2. Phenotype analysis of wild-type, mutant, and transgenic rice plants.** (a) Phenotypes of 7-day-old and 15-day-old seedlings. Bars = 5cm. (b) Primary roots length analysis of DJ and *osmads57-1* (7-day-old). \*\* indicates  $P < 0.01$  by Student's *t*-test. (c) Flower phenotypes of wild-type and transgenic rice plants. ZH10, wild type Zhonghua10; DJ, wild type Dongjin; AS3, antisense *OsMADS57*-overexpressed line 3; miROE, *OsMIR444a*-overexpressed line. Bar = 1cm.

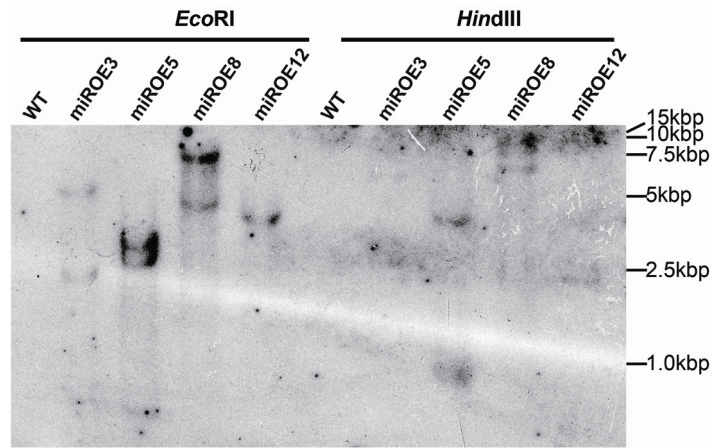

**Supplementary Figure S3. Southern blot analysis of *OsMIR444a* transgenic rice plants.** Genomic DNA isolated from wild-type and transgenic line 5 (miROE5), line 8 (miROE8) and line 12 (miROE12) was digested with *EcoR* I and *Hind* III. The blot was hybridized with the open reading frame of the *GUS* gene labeled with [ $\alpha$ - $^{32}$ P] dCTP. *GUS* was present in the vector. Southern blot analysis with various insertions on the genome indicated that miROE5, miROE8 and miROE12 were independent lines.

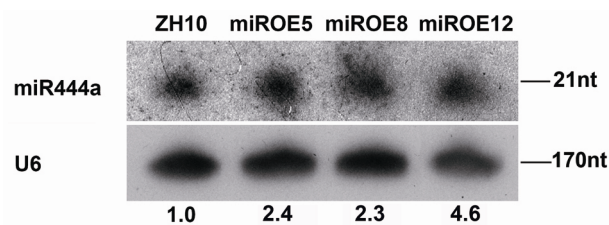

**Supplementary Figure S4. Northern blot analysis of miR444a in the transgenic lines miROE5, miROE8, and miROE12.** Numerals indicate the miR444a content of transgenic plants relative to that of ZH10 plants. U6 was used as loading control.



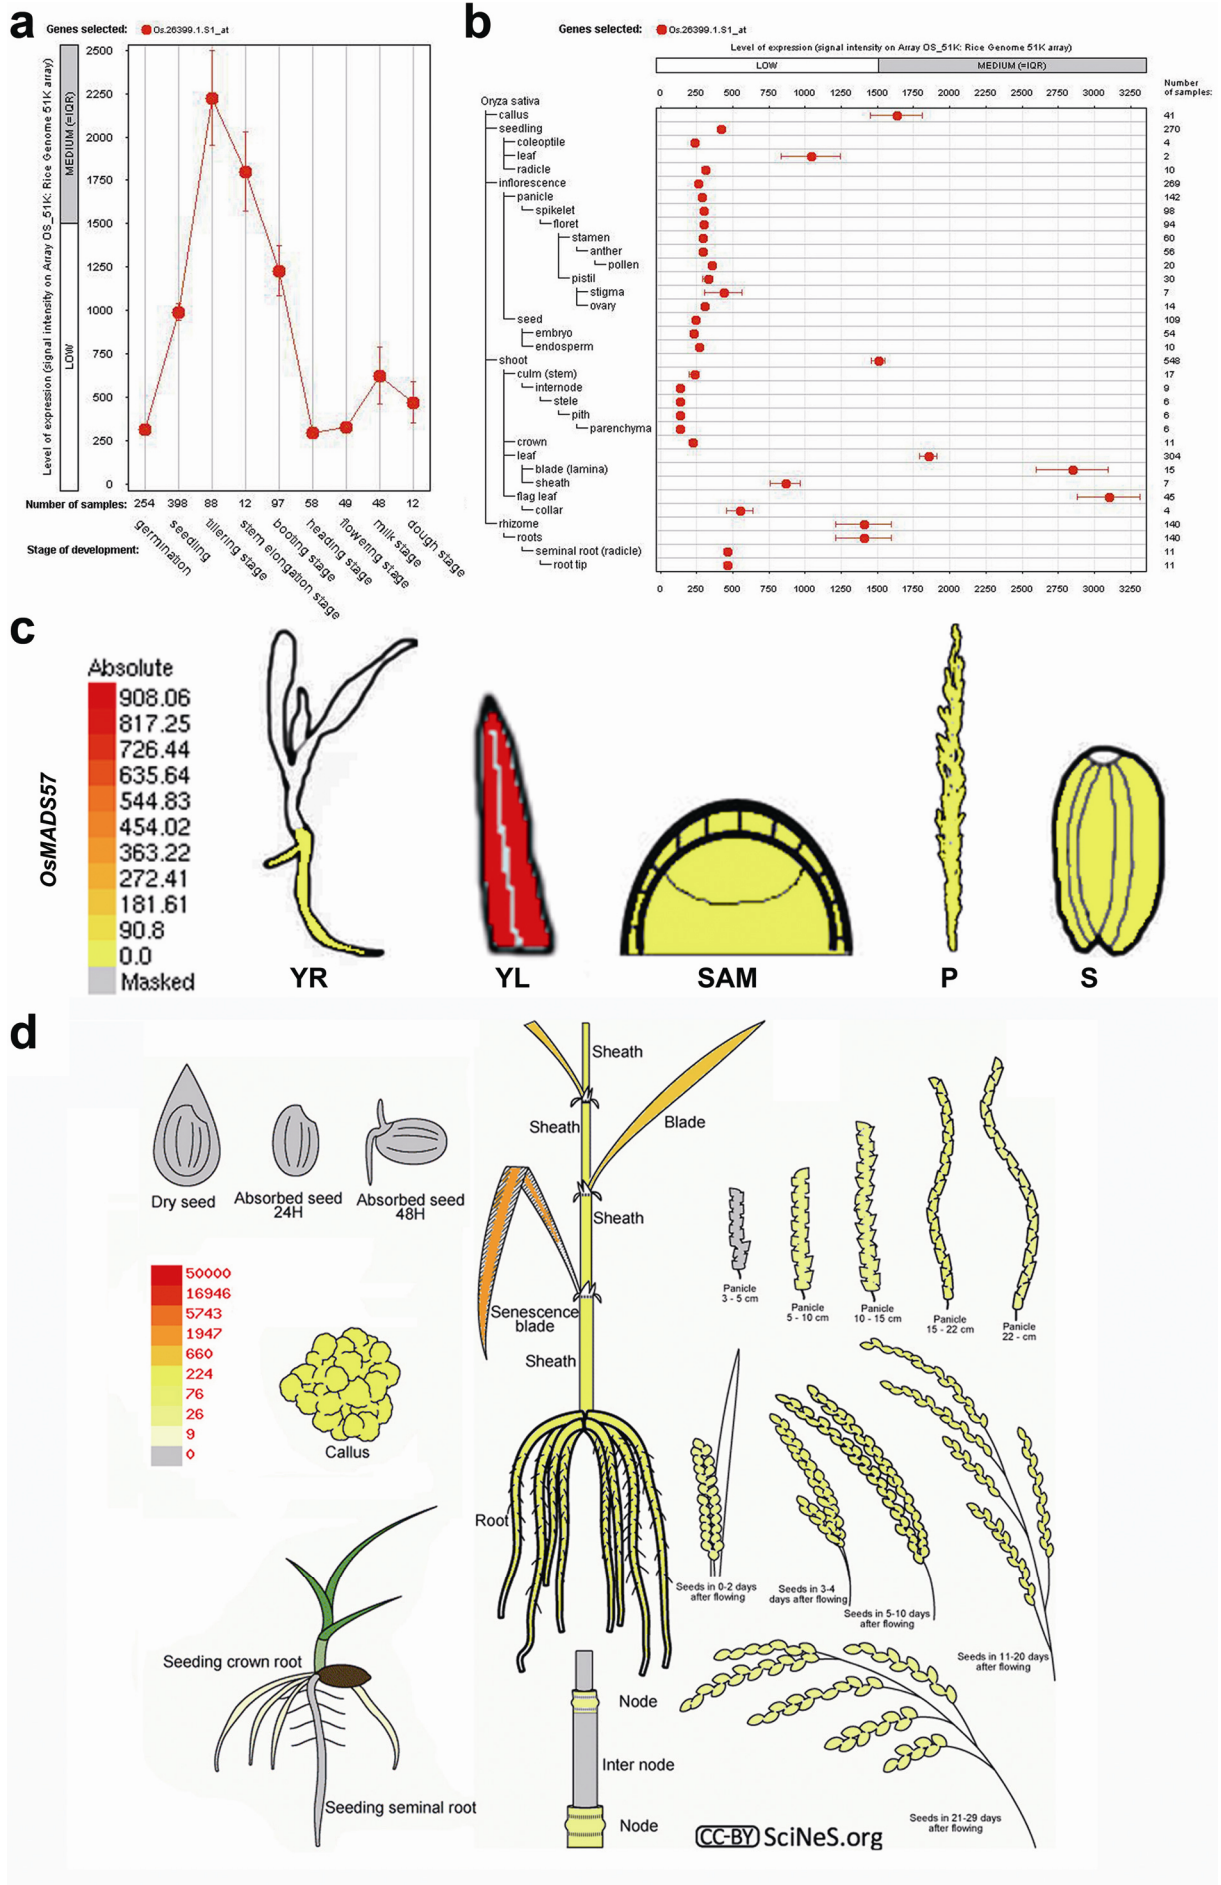

Supplementary Figure S5. Expression pattern of *OsMADS57*. (a) Expression pattern of

*OsMADS57* in different developmental stages based on microarray data displayed in the Geninvestigator (<https://www.geneinvestigator.com/gv/>). (b) Expression pattern of *OsMADS57* in different organs based on microarray data displayed in the Geninvestigator (<https://www.geneinvestigator.com/gv/>). (c) Relative expression of *OsMADS57* in young seedling root (YR), young leaf (YL), shoot apical meristem (SAM), inflorescence (P) and seeds (S) based on microarray data displayed in the eFP browser (<http://www.bar.utoronto.ca/efp/cgi-bin/efpWeb.cgi>). Color scale shows microarray signal level. (d) Relative *OsMADS57* expression in different rice tissues as determined by microarray analysis using the eFP browser (HANDB-OS). Color scale indicates microarray signal levels.

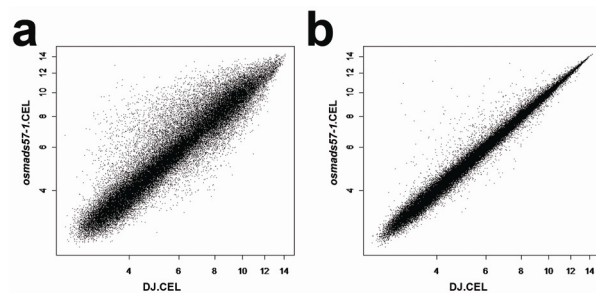

**Supplementary Figure S6. Scatter plots of the two biologically replicated microarray data depicting global expression patterns of wild type DJ versus *osmads57-1*.** (a) Microarray replicates 1. (b) Microarray analysis 2. In each scatterplot, the wild type DJ sample versus *osmads57-1* sample microarray expression data following normalization with RMA is shown. All 57,381 Log base 2 transformed probe (gene) signal intensities (range 0 - 14) for the DJ arrays are plotted on the x-axes and the corresponding value (range 0 - 14) for the *osmads57-1* arrays on the y-axes.

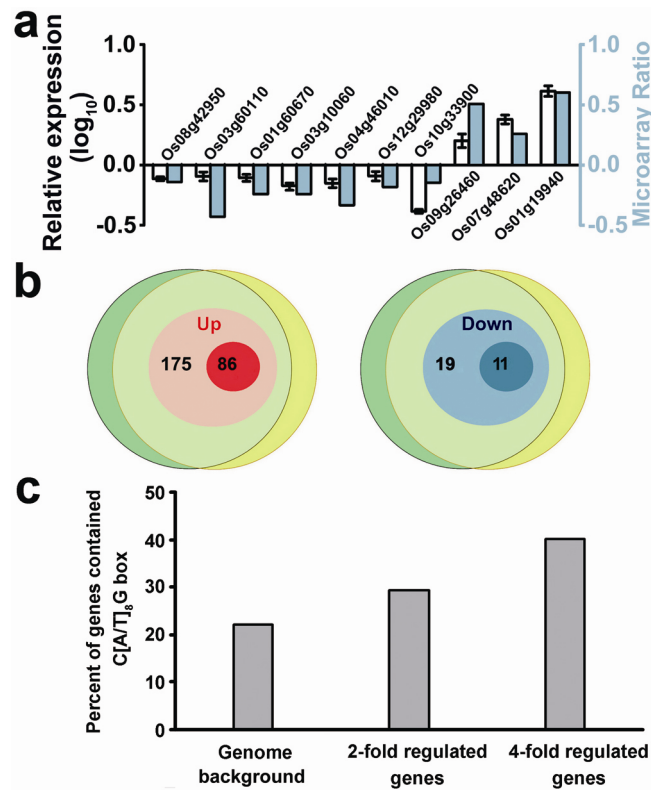

**Supplementary Figure S7. Whole-genome microarray analysis of *osmads57-1* and cis-element CArG box screening.** (a) Comparison of qRT-PCR analysis of transcript levels and the microarray ratio for the 10 randomly chosen genes. qRT-PCR expression was normalized to *ACTIN* expression, which was defined as 0. Values represent means  $\pm$  SE of three technical replicates. (b) Genes up- or down-regulated in *osmads57-1* in the microarray data. The biggest cakes with green and yellow represent the number of gene signals in *osmads57-1* and wild-type DJ, respectively. The pink cake represents the genes up-regulated at least 2-fold in *osmads57-1*. The red cake represents the predicted target genes. The azury cake represents genes down-regulated at least 2-fold in *osmads57-1*. The blue cake represents the predicted target genes. (c) The proportion of genes contained the CArG-box sequence C[A/T]<sub>8</sub>G in whole genome, genes with more than 2-fold and with more than 4-fold.

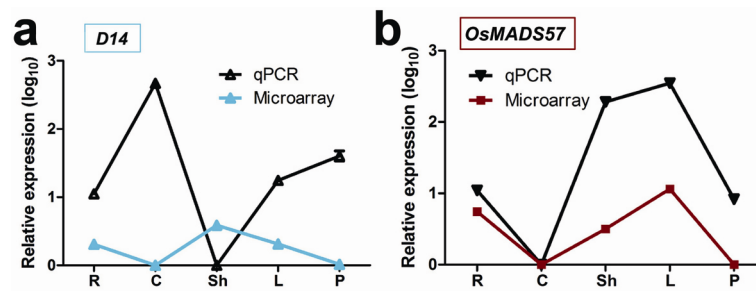

**Supplementary Figure S8. Expression pattern comparing of Affymetric chip and qPCR.**

(a) *D14* gene expression showed inconsistent pattern between Microarray and qPCR. (b) The consistent patterns on *OsMADS57* were the positive controls. It hints the biased probes of *D14* appeared on the Affymetrix GenChip. Expression pattern of *D14* and *OsMADS57* in different organs based on microarray data displayed in the Geninvestigator (<https://www.genevestigator.com/gv/>). R, root; C, colm; Sh, sheath; L, leaf; P, panicle.

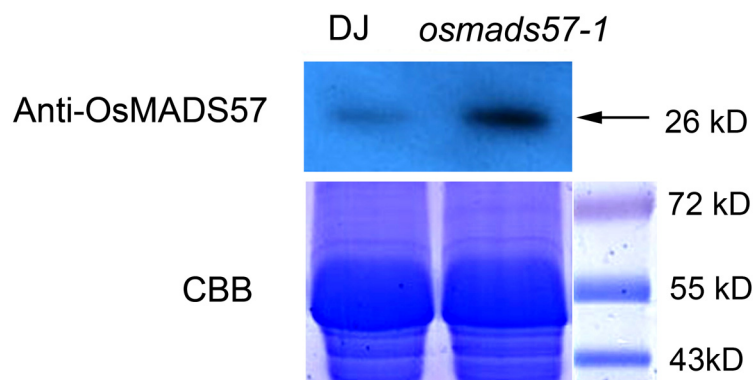

**Supplementary Figure S9. Specific verification of the *OsMADS57* polyclonal antibody.**

Western blot analysis of the expression level of *OsMADS57* protein in WT Dongjin (DJ) and mutant *osmads57-1* seedlings shows that the purified anti-MADS57 polyclonal antibody is specific and can be used in the chromatin immunoprecipitation assays. The Rubisco small subunit was stained by coomassie brilliant blue (CBB) and used as the loading control for total protein.



**Supplementary Table S1.** The up- or down-regulated genes in mutant *osmads57-1* from the microarray data (up- and down-regulated genes with  $|\log_2 \text{ratio}| \geq 1$ ).

| No. | Probe ID               | Locus ID       | Change<br>(Log <sub>2</sub><br>ratio) | Putative function                                                                  |
|-----|------------------------|----------------|---------------------------------------|------------------------------------------------------------------------------------|
| 1   | Os.43929.1.S1_s_at     | LOC_Os03g02470 | 7.32                                  | expressed protein                                                                  |
| 2   | Os.10266.1.S1_at       | LOC_Os03g43100 | 5.47                                  | expressed protein                                                                  |
| 3   | Os.10660.1.S1_at       | LOC_Os07g06834 | 5.21                                  | expressed protein                                                                  |
| 4   | OsAffx.22999.1.S1_at   | LOC_Os07g32710 | 5.16                                  | retrotransposon protein, putative, unclassified, expressed                         |
| 5   | Os.44418.1.S1_at       | LOC_Os07g11150 | 4.87                                  | expressed protein                                                                  |
| 6   | Os.15171.1.S1_s_at     | LOC_Os12g37260 | 4.50                                  | lipoxygenase 2.1, chloroplast precursor, putative, expressed                       |
| 7   | OsAffx.21743.1.S1_s_at | LOC_Os12g35470 | 4.35                                  | expressed protein                                                                  |
| 8   | Os.6863.1.S1_s_at      | LOC_Os12g14440 | 4.09                                  | Jacalin-like lectin domain containing protein, putative, expressed                 |
| 9   | Os.20614.3.S1_x_at     | LOC_Os01g36064 | 3.81                                  | hAT dimerisation domain-containing protein, putative, expressed                    |
| 10  | Os.30000.1.S1_at       | LOC_Os07g36560 | 3.70                                  | transferase family protein, putative, expressed                                    |
| 11  | OsAffx.21616.1.S1_s_at | LOC_Os01g54890 | 3.67                                  | ethylene-responsive transcription factor 2, putative, expressed                    |
| 12  | Os.11812.1.S1_at       | LOC_Os02g48770 | 3.64                                  | SAM dependent carboxyl methyltransferase, putative, expressed                      |
| 13  | Os.48216.1.S1_at       | LOC_Os09g34250 | 3.58                                  | UDP-glucuronosyl and UDP-glucosyl transferase domain containing protein, expressed |
| 14  | Os.32194.1.S1_at       | LOC_Os03g39960 | 3.56                                  | expressed protein                                                                  |

|           |                         |                       |             |                                                                                  |
|-----------|-------------------------|-----------------------|-------------|----------------------------------------------------------------------------------|
| 15        | Os.20154.1.S1_at        | LOC_Os02g56700        | 3.51        | dehydrogenase, putative, expressed                                               |
| 16        | Os.9739.1.S1_at         | LOC_Os04g05650        | 3.47        | expressed protein                                                                |
| 17        | Os.11851.1.S1_at        | LOC_Os03g11900        | 3.35        | transporter family protein, putative, expressed                                  |
| 18        | Os.14616.1.S1_at        | LOC_Os07g34260        | 3.32        | chalcone and stilbene synthases, putative, expressed                             |
| 19        | Os.21524.1.S1_at        | LOC_Os10g05820        | 3.31        | POEI5 - Pollen Ole e I allergen and extensin family protein precursor, expressed |
| 20        | Os.20420.1.S1_at        | LOC_Os01g18120        | 3.23        | cinnamoyl CoA reductase, putative, expressed                                     |
| 21        | Os.23207.1.S1_at        | LOC_Os08g04340        | 3.15        | plastocyanin-like domain containing protein, putative, expressed                 |
| 22        | Os.7095.1.S1_at         | LOC_Os04g49210        | 3.13        | naringenin,2-oxoglutarate 3-dioxygenase, putative, expressed                     |
| 23        | OsAffx.28294.3.S1_x_at  | LOC_Os05g36240        | 3.06        | expressed protein                                                                |
| 24        | Os.10659.1.S1_at        | LOC_Os07g26100        | 3.03        | expressed protein                                                                |
| <b>25</b> | <b>Os.26399.1.S1_at</b> | <b>LOC_Os02g49840</b> | <b>2.99</b> | <b>OsMADS57 - MADS-box family gene with MIKC<sup>c</sup> type-box, expressed</b> |
| 26        | Os.10908.1.S1_a_at      | LOC_Os08g36910        | 2.98        | alpha-amylase precursor, putative, expressed                                     |
| 27        | Os.55611.1.S1_s_at      | LOC_Os11g05660        | 2.96        | OsFBX396 - F-box domain containing protein, expressed                            |
| 28        | Os.53604.1.S1_at        | LOC_Os03g52860        | 2.91        | lipoxygenase, putative, expressed                                                |
| 29        | Os.29987.2.S1_at        | LOC_Os05g50610        | 2.87        | WRKY8, expressed                                                                 |
| 30        | Os.46604.1.S1_s_at      | LOC_Os01g35330        | 2.83        | circumsporozoite protein precursor, putative, expressed                          |
| 31        | Os.54232.1.S1_at        | LOC_Os05g37190        | 2.78        | ZOS5-08 - C2H2 zinc finger protein, expressed                                    |

|    |                      |                |      |                                                                              |
|----|----------------------|----------------|------|------------------------------------------------------------------------------|
| 32 | Os.50399.1.S1_at     | LOC_Os06g05420 | 2.78 | expressed protein                                                            |
| 33 | Os.8545.1.S1_s_at    | LOC_Os01g19940 | 2.76 | expressed protein                                                            |
| 34 | Os.55682.1.S1_at     | LOC_Os03g22820 | 2.75 | expressed protein                                                            |
| 35 | Os.57052.1.S1_at     | LOC_Os03g04760 | 2.74 | expressed protein                                                            |
| 36 | Os.22935.1.S1_at     | LOC_Os05g12040 | 2.73 | cytochrome P450 51, putative, expressed                                      |
| 37 | Os.50449.1.S1_at     | LOC_Os03g10640 | 2.71 | calcium-transporting ATPase, plasma membrane-type, putative, expressed       |
| 38 | Os.10579.1.S1_at     | LOC_Os08g02700 | 2.69 | fructose-bisphosphate aldolase isozyme, putative, expressed                  |
| 39 | Os.44475.1.S1_x_at   | LOC_Os07g37730 | 2.69 | NADH-ubiquinone oxidoreductase, mitochondrial precursor, putative, expressed |
| 40 | Os.32459.1.S1_at     | LOC_Os01g03310 | 2.68 | BBT11 - Bowman-Birk type bran trypsin inhibitor precursor, expressed         |
| 41 | OsAffx.30784.1.S1_at | LOC_Os11g02540 | 2.67 | WRKY50, expressed                                                            |
| 42 | Os.33184.1.S1_at     | LOC_Os01g51870 | 2.65 | methyltransferase, putative, expressed                                       |
| 43 | Os.487.1.S1_at       | LOC_Os01g15340 | 2.61 | flowering promoting factor-like 1, putative, expressed                       |
| 44 | Os.55961.1.S1_at     | LOC_Os07g34280 | 2.60 | CXE carboxylesterase, putative, expressed                                    |
| 45 | Os.48082.1.S1_at     | LOC_Os09g25070 | 2.58 | WRKY62, expressed                                                            |
| 46 | Os.54936.1.S1_at     | LOC_Os03g57640 | 2.57 | gibberellin receptor GID1L2, putative, expressed                             |
| 47 | Os.32889.1.S1_at     | LOC_Os07g03040 | 2.56 | expressed protein                                                            |
| 48 | Os.54934.1.S1_at     | LOC_Os05g37060 | 2.55 | MYB family transcription factor, putative, expressed                         |

|    |                      |                |      |                                                                        |
|----|----------------------|----------------|------|------------------------------------------------------------------------|
| 49 | Os.49838.1.S1_at     | LOC_Os04g47720 | 2.55 | cis-zeatin O-glucosyltransferase, putative, expressed                  |
| 50 | Os.49527.1.S1_at     | LOC_Os03g03790 | 2.51 | AMP-binding domain containing protein, expressed                       |
| 51 | Os.8778.1.S1_a_at    | LOC_Os06g11290 | 2.48 | 12-oxophytodienoate reductase, putative, expressed                     |
| 52 | Os.27247.1.S1_at     | LOC_Os06g50950 | 2.47 | GDSL-like lipase/acylhydrolase, putative, expressed                    |
| 53 | Os.6776.1.S1_at      | LOC_Os07g35480 | 2.45 | glucan endo-1,3-beta-glucosidase precursor, putative, expressed        |
| 54 | OsAffx.16037.1.S1_at | LOC_Os07g01960 | 2.45 | hypothetical protein                                                   |
| 55 | Os.11417.1.S1_at     | LOC_Os02g26810 | 2.45 | cytochrome P450, putative, expressed                                   |
| 56 | Os.26932.1.S1_at     | LOC_Os07g37320 | 2.44 | transporter family protein, putative, expressed                        |
| 57 | Os.26511.1.S1_at     | LOC_Os04g49370 | 2.44 | expressed protein                                                      |
| 58 | Os.50413.1.S1_at     | LOC_Os04g01690 | 2.43 | pyridoxal-dependent decarboxylase protein, putative, expressed         |
| 59 | Os.7935.2.S1_x_at    | LOC_Os07g46852 | 2.43 | sex determination protein tasselseed-2, putative, expressed            |
| 60 | Os.16099.1.S1_at     | LOC_Os01g18860 | 2.42 | S-adenosylmethionine synthetase, putative, expressed                   |
| 61 | Os.467.1.S1_a_at     | LOC_Os01g42380 | 2.36 | pleiotropic drug resistance protein, putative, expressed               |
| 62 | Os.5049.1.S1_at      | LOC_Os10g20470 | 2.32 | MATE efflux family protein, putative, expressed                        |
| 63 | Os.9067.1.S1_at      | LOC_Os07g44140 | 2.32 | cytochrome P450 72A1, putative, expressed                              |
| 64 | Os.56966.1.S1_at     | LOC_Os05g50390 | 2.32 | expressed protein                                                      |
| 65 | Os.21524.2.S1_x_at   | LOC_Os10g05840 | 2.30 | POEI6 - Pollen Ole e I allergen and extensin family protein precursor, |

|    |                    |                |      |                                                                                   |
|----|--------------------|----------------|------|-----------------------------------------------------------------------------------|
|    |                    |                |      | expressed                                                                         |
| 66 | Os.1606.1.S1_at    | LOC_Os04g56430 | 2.25 | cysteine-rich receptor-like protein kinase, putative, expressed                   |
| 67 | Os.12038.1.S1_at   | LOC_Os01g65700 | 2.17 | expressed protein                                                                 |
| 68 | Os.10546.1.S1_s_at | LOC_Os09g34230 | 2.16 | UDP-glucuronosyl/UDP-glucosyl transferase, putative, expressed                    |
| 69 | Os.55392.1.S1_at   | LOC_Os02g57350 | 2.16 | expressed protein                                                                 |
| 70 | Os.4766.1.S1_at    | LOC_Os10g28350 | 2.14 | 1,2-dihydroxy-3-keto-5-methylthiopentene dioxygenase protein, putative, expressed |
| 71 | Os.15633.1.S2_at   | LOC_Os10g35460 | 2.14 | COBRA, putative, expressed                                                        |
| 72 | Os.53407.1.S1_at   | LOC_Os08g06210 | 2.13 | expressed protein                                                                 |
| 73 | Os.52536.1.S1_at   | LOC_Os04g43800 | 2.13 | phenylalanine ammonia-lyase, putative, expressed                                  |
| 74 | Os.7938.1.S1_at    | LOC_Os04g59190 | 2.13 | peroxidase precursor, putative, expressed                                         |
| 75 | Os.17182.1.S1_at   | LOC_Os03g04570 | 2.13 | peptide transporter PTR3-A, putative, expressed                                   |
| 76 | Os.6075.1.S2_at    | LOC_Os04g06520 | 2.12 | expressed protein                                                                 |
| 77 | Os.54358.1.S1_at   | LOC_Os11g17954 | 2.12 | transposon protein, putative, Pong sub-class, expressed                           |
| 78 | Os.44418.2.S1_at   | LOC_Os02g03640 | 2.08 | expressed protein                                                                 |
| 79 | Os.11952.1.S1_at   | LOC_Os02g11070 | 2.07 | 3-ketoacyl-CoA synthase, putative, expressed                                      |
| 80 | Os.10356.1.S1_at   | LOC_Os03g08320 | 2.07 | ZIM domain containing protein, putative, expressed                                |
| 81 | Os.50985.1.S1_at   | LOC_Os05g36260 | 2.07 | soluble inorganic pyrophosphatase, putative, expressed                            |
| 82 | Os.10930.1.S1_at   | LOC_Os02g41670 | 2.06 | phenylalanine ammonia-lyase, putative, expressed                                  |



|    |                      |                |      |                                                                                                |
|----|----------------------|----------------|------|------------------------------------------------------------------------------------------------|
| 83 | Os.46956.1.S1_at     | LOC_Os01g50940 | 2.06 | helix-loop-helix DNA-binding domain containing protein, expressed                              |
| 84 | Os.10505.1.S1_a_at   | LOC_Os10g39010 | 2.05 | TKL_IRAK_CrRLK1L-1.16 - The CrRLK1L-1 subfamily has homology to the CrRLK1L homolog, expressed |
| 85 | OsAffx.29770.1.S1_at | LOC_Os09g08720 | 1.98 | cinnamoyl CoA reductase, putative, expressed                                                   |
| 86 | Os.26698.1.S1_a_at   | LOC_Os01g19820 | 1.98 | universal stress protein domain containing protein, putative, expressed                        |
| 87 | Os.15917.1.S1_at     | LOC_Os04g41960 | 1.98 | NADP-dependent oxidoreductase, putative, expressed                                             |
| 88 | Os.55674.1.S1_at     | LOC_Os05g46830 | 1.97 | proline-rich protein, putative, expressed                                                      |
| 89 | Os.55253.1.S1_at     | LOC_Os05g11610 | 1.96 | expressed protein                                                                              |
| 90 | Os.4618.1.S1_at      | LOC_Os01g32670 | 1.95 | expressed protein                                                                              |
| 91 | Os.57191.1.S1_at     | LOC_Os06g05470 | 1.94 | expressed protein                                                                              |
| 92 | Os.4184.1.S1_at      | LOC_Os02g15350 | 1.93 | dof zinc finger domain containing protein, putative, expressed                                 |
| 93 | OsAffx.26230.2.S1_at | LOC_Os02g42450 | 1.93 | RIPER1 - Ripening-related family protein precursor, expressed                                  |
| 94 | Os.27292.1.A1_at     | LOC_Os04g44354 | 1.92 | UDP-glucuronosyl and UDP-glucosyl transferase domain containing protein, expressed             |
| 95 | OsAffx.13360.1.S1_at | LOC_Os03g45280 | 1.88 | dehydrin, putative, expressed                                                                  |
| 96 | Os.49410.1.A1_at     | LOC_Os04g33240 | 1.86 | sex determination protein tasselseed-2, putative, expressed                                    |
| 97 | Os.11193.1.S1_at     | LOC_Os03g55240 | 1.85 | cytochrome P450, putative, expressed                                                           |
| 98 | Os.6244.1.S1_x_at    | LOC_Os03g13740 | 1.85 | immediate-early fungal elicitor                                                                |

|     |                        |                |      |                                                                                         |
|-----|------------------------|----------------|------|-----------------------------------------------------------------------------------------|
|     |                        |                |      | protein CMPG1, putative, expressed                                                      |
| 99  | Os.7206.1.S1_at        | LOC_Os01g45250 | 1.84 | DUF1645 domain containing protein, putative, expressed                                  |
| 100 | Os.12948.1.S1_at       | LOC_Os02g08420 | 1.84 | cinnamoyl CoA reductase, putative, expressed                                            |
| 101 | Os.12535.1.S1_at       | LOC_Os01g52230 | 1.80 | phosphoethanolamine/phosphocholine phosphatase, putative, expressed                     |
| 102 | Os.8920.1.S1_at        | LOC_Os07g47790 | 1.80 | AP2 domain containing protein, expressed                                                |
| 103 | OsAffx.8070.1.S1_x_at  | LOC_Os01g60590 | 1.79 | transposon protein, putative, Pong sub-class, expressed                                 |
| 104 | Os.11195.1.S1_at       | LOC_Os07g17330 | 1.77 | B12D protein, putative, expressed                                                       |
| 105 | Os.45887.1.S1_at       | LOC_Os01g12750 | 1.76 | cytochrome P450, putative, expressed                                                    |
| 106 | Os.15281.1.S1_x_at     | LOC_Os07g46920 | 1.76 | sex determination protein tasselseed-2, putative, expressed                             |
| 107 | Os.12498.2.S1_at       | LOC_Os01g72360 | 1.76 | expressed protein                                                                       |
| 108 | Os.34139.1.S1_at       | LOC_Os08g04630 | 1.75 | external NADH-ubiquinone oxidoreductase 1, mitochondrial precursor, putative, expressed |
| 109 | Os.47761.1.S1_at       | LOC_Os03g13300 | 1.74 | glutamate decarboxylase, putative, expressed                                            |
| 110 | Os.14631.1.S1_at       | LOC_Os07g13770 | 1.74 | UDP-glucuronosyl and UDP-glucosyl transferase domain containing protein, expressed      |
| 111 | Os.30608.2.S1_x_at     | LOC_Os02g41954 | 1.73 | gibberellin 2-beta-dioxygenase 7, putative, expressed                                   |
| 112 | OsAffx.23744.1.S1_s_at | LOC_Os01g51310 | 1.73 | expressed protein                                                                       |
| 113 | Os.34199.1.S1_at       | LOC_Os01g72630 | 1.72 | expressed protein                                                                       |
| 114 | Os.18041.1.S1_at       | LOC_Os02g51730 | 1.72 | dnaJ homolog subfamily C member 7, putative, expressed                                  |

|     |                       |                |      |                                                                                                                     |
|-----|-----------------------|----------------|------|---------------------------------------------------------------------------------------------------------------------|
| 115 | Os.7770.1.S1_at       | LOC_Os05g05030 | 1.70 | expressed protein                                                                                                   |
| 116 | Os.16540.1.S1_at      | LOC_Os07g06830 | 1.70 | gibberellin receptor GID1L2, putative, expressed                                                                    |
| 117 | Os.24471.1.S1_at      | LOC_Os07g30760 | 1.70 | UDP-glucuronosyl and UDP-glucosyl transferase domain containing protein, expressed                                  |
| 118 | Os.9116.1.S1_at       | LOC_Os01g28680 | 1.70 | WD domain, G-beta repeat domain containing protein, expressed                                                       |
| 119 | Os.8629.1.S1_x_at     | LOC_Os12g02320 | 1.68 | LTPL12 - Protease inhibitor/seed storage/LTP family protein precursor, expressed                                    |
| 120 | OsAffx.26673.1.S1_at  | LOC_Os05g01010 | 1.66 | expressed protein                                                                                                   |
| 121 | Os.35013.1.S1_at      | LOC_Os03g16170 | 1.66 | protein phosphatase 2C, putative, expressed                                                                         |
| 122 | Os.27170.1.S1_at      | LOC_Os01g50400 | 1.66 | STE_MEKK_ste11_MAP3K.5 - STE kinases include homologs to sterile 7, sterile 11 and sterile 20 from yeast, expressed |
| 123 | Os.48711.1.A1_at      | LOC_Os11g45990 | 1.65 | von Willebrand factor type A domain containing protein, putative, expressed                                         |
| 124 | Os.18570.1.S1_at      | LOC_Os07g02970 | 1.65 | expressed protein                                                                                                   |
| 125 | Os.52661.1.S1_at      | LOC_Os11g44680 | 1.64 | calmodulin binding protein, putative, expressed                                                                     |
| 126 | Os.49479.1.S1_at      | LOC_Os05g05020 | 1.64 | expressed protein                                                                                                   |
| 127 | OsAffx.9584.1.S1_x_at | LOC_Os01g60600 | 1.64 | WRKY108, expressed                                                                                                  |
| 128 | OsAffx.28294.2.S1_at  | LOC_Os07g05840 | 1.60 | expressed protein                                                                                                   |
| 129 | Os.26430.1.A1_at      | LOC_Os12g07180 | 1.58 | transposon protein, putative, Pong sub-class, expressed                                                             |
| 130 | Os.22783.1.S1_s_at    | LOC_Os05g31750 | 1.58 | annexin, putative, expressed                                                                                        |
| 131 | Os.53217.1.S1_x_at    | LOC_Os03g03034 | 1.57 | flavonol synthase/flavanone                                                                                         |

|     |                         |                |      |                                                                                               |
|-----|-------------------------|----------------|------|-----------------------------------------------------------------------------------------------|
|     |                         |                |      | 3-hydroxylase, putative, expressed                                                            |
| 132 | OsAffx.24369.13.S1_s_at | LOC_Os01g49370 | 1.55 | expressed protein                                                                             |
| 133 | OsAffx.26540.1.S1_s_at  | LOC_Os04g49550 | 1.54 | RING-H2 finger protein ATL2A, putative, expressed                                             |
| 134 | Os.57108.1.S1_at        | LOC_Os12g24330 | 1.53 | expressed protein                                                                             |
| 135 | Os.27251.1.S1_at        | LOC_Os04g10350 | 1.52 | 1-aminocyclopropane-1-carboxylate oxidase homolog 2, putative, expressed                      |
| 136 | Os.55583.1.S1_at        | LOC_Os09g38110 | 1.50 | RING-H2 finger protein, putative, expressed                                                   |
| 137 | Os.45928.1.S1_at        | LOC_Os01g32460 | 1.50 | expressed protein                                                                             |
| 138 | Os.648.1.S1_at          | LOC_Os01g43480 | 1.49 | AAA-type ATPase family protein, putative, expressed                                           |
| 139 | Os.4385.1.S1_at         | LOC_Os11g08210 | 1.48 | no apical meristem protein, putative, expressed                                               |
| 140 | Os.11575.3.S1_x_at      | LOC_Os03g46440 | 1.48 | BTBA4 - Bric-a-Brac,Tramtrack, Broad Complex BTB domain with Ankyrin repeat region, expressed |
| 141 | Os.49627.1.S1_at        | LOC_Os06g37150 | 1.47 | L-ascorbate oxidase precursor, putative, expressed                                            |
| 142 | Os.1191.1.S1_at         | LOC_Os03g04060 | 1.47 | CHIT16 - Chitinase family protein precursor, expressed                                        |
| 143 | Os.50104.1.S1_at        | LOC_Os06g40180 | 1.47 | phospholipase D, putative, expressed                                                          |
| 144 | Os.19375.1.S1_at        | LOC_Os08g34790 | 1.43 | AMP-binding domain containing protein, expressed                                              |
| 145 | Os.21801.1.S1_at        | LOC_Os01g04620 | 1.42 | transposon protein, putative, unclassified, expressed                                         |
| 146 | Os.5045.1.S1_at         | LOC_Os01g03680 | 1.40 | BBT18 - Bowman-Birk type bran trypsin inhibitor precursor, expressed                          |

|     |                       |                |      |                                                                                           |
|-----|-----------------------|----------------|------|-------------------------------------------------------------------------------------------|
| 147 | Os.12642.1.S1_at      | LOC_Os08g42750 | 1.40 | CAMK_CAMK_like.37 - CAMK includes calcium/calmodulin dependent protein kinases, expressed |
| 148 | Os.52344.1.S1_at      | LOC_Os08g26840 | 1.40 | plant protein of unknown function domain containing protein, expressed                    |
| 149 | Os.26626.1.S1_at      | LOC_Os05g33400 | 1.38 | basic 7S globulin precursor, putative, expressed                                          |
| 150 | Os.12199.1.S1_at      | LOC_Os01g66120 | 1.36 | No apical meristem protein, putative, expressed                                           |
| 151 | Os.11552.1.S1_at      | LOC_Os04g59150 | 1.36 | peroxidase precursor, putative, expressed                                                 |
| 152 | Os.1438.1.S1_at       | LOC_Os01g06590 | 1.35 | zinc finger, C3HC4 type domain containing protein, expressed                              |
| 153 | Os.46872.1.S1_at      | LOC_Os10g37160 | 1.35 | transposon protein, putative, unclassified, expressed                                     |
| 154 | OsAffx.24166.1.S1_at  | LOC_Os02g08440 | 1.35 | WRKY71, expressed                                                                         |
| 155 | Os.50455.1.S1_at      | LOC_Os06g40170 | 1.34 | phospholipase D, putative, expressed                                                      |
| 156 | Os.22706.1.S1_at      | LOC_Os02g54760 | 1.32 | cyclic nucleotide-gated ion channel 14, putative, expressed                               |
| 157 | Os.12063.1.S1_at      | LOC_Os02g11859 | 1.31 | expressed protein                                                                         |
| 158 | Os.5711.1.S1_at       | LOC_Os01g32610 | 1.31 | expressed protein                                                                         |
| 159 | Os.34174.1.S1_at      | LOC_Os04g38790 | 1.30 | expressed protein                                                                         |
| 160 | OsAffx.3357.1.S1_s_at | LOC_Os03g28990 | 1.30 | zinc finger family protein, putative, expressed                                           |
| 161 | Os.6452.2.A1_a_at     | LOC_Os01g43710 | 1.27 | cytochrome P450 72A1, putative, expressed                                                 |
| 162 | Os.7985.1.S1_at       | LOC_Os03g18070 | 1.25 | omega-3 fatty acid desaturase, chloroplast precursor, putative, expressed                 |



|     |                        |                |       |                                                                                   |
|-----|------------------------|----------------|-------|-----------------------------------------------------------------------------------|
| 163 | Os.11575.4.S1_x_at     | LOC_Os01g08500 | 1.25  | transposon protein, putative, Pong sub-class, expressed                           |
| 164 | Os.21260.1.S1_at       | LOC_Os03g08580 | 1.22  | expressed protein                                                                 |
| 165 | OsAffx.19515.1.S1_s_at | LOC_Os12g06080 | 1.22  | expressed protein                                                                 |
| 166 | Os.10172.1.S1_at       | LOC_Os02g41510 | 1.22  | MYB family transcription factor, putative, expressed                              |
| 167 | Os.48076.1.S1_at       | LOC_Os12g36750 | 1.21  | expressed protein                                                                 |
| 168 | OsAffx.19635.1.S1_at   | LOC_Os12g12720 | 1.18  | jasmonate-induced protein, putative, expressed                                    |
| 169 | Os.36901.1.S1_at       | LOC_Os01g58150 | 1.17  | expressed protein                                                                 |
| 170 | Os.33722.1.S1_at       | LOC_Os01g53430 | 1.14  | anthocyanidin<br>5,3-O-glucosyltransferase, putative, expressed                   |
| 171 | OsAffx.24356.1.S1_at   | LOC_Os02g20950 | 1.12  | expressed protein                                                                 |
| 172 | Os.10339.1.S1_at       | LOC_Os03g04770 | 1.11  | beta-amylase, putative, expressed                                                 |
| 173 | Os.11617.1.S1_at       | LOC_Os05g49140 | 1.10  | CGMC_MAPKCMGC_2.8 - CGMC includes CDA, MAPK, GSK3, and CLKC kinases, expressed    |
| 174 | OsAffx.30647.1.S1_x_at | LOC_Os10g32940 | 1.09  | expressed protein                                                                 |
| 175 | Os.19952.1.S1_at       | LOC_Os01g09450 | 1.06  | OsIAA2 - Auxin-responsive Aux/IAA gene family member, expressed                   |
| 176 | Os.27486.1.S1_x_at     | LOC_Os11g01074 | -1.05 | RNase P subunit p30, putative, expressed                                          |
| 177 | OsAffx.6610.1.A1_at    | LOC_Os10g08879 | -1.10 | nucleotide-sensitive chloride conductance regulator containing protein, expressed |
| 178 | Os.9194.1.S1_at        | LOC_Os02g52040 | -1.10 | phosphate-induced protein 1 conserved region domain containing protein, expressed |

|     |                        |                |       |                                                                                 |
|-----|------------------------|----------------|-------|---------------------------------------------------------------------------------|
| 179 | OsAffx.24040.1.S1_s_at | LOC_Os01g74340 | -1.12 | RNA recognition motif containing protein, putative, expressed                   |
| 180 | Os.50487.1.S1_at       | LOC_Os03g21960 | -1.15 | aminotransferase, putative, expressed                                           |
| 181 | Os.50502.1.S1_at       | LOC_Os11g27329 | -1.15 | OsSCP62 - Putative Serine Carboxypeptidase homologue, expressed                 |
| 182 | Os.27509.1.S1_at       | LOC_Os01g53790 | -1.17 | stress-induced protein, putative, expressed                                     |
| 183 | Os.5213.1.S1_at        | LOC_Os02g44720 | -1.19 | expressed protein                                                               |
| 184 | Os.50578.1.S1_x_at     | LOC_Os11g20239 | -1.39 | expressed protein                                                               |
| 185 | Os.35216.1.S1_at       | LOC_Os02g34760 | -1.40 | retrotransposon protein, putative, unclassified, expressed                      |
| 186 | Os.9661.1.S1_at        | LOC_Os03g04620 | -1.42 | CCT motif family protein, expressed                                             |
| 187 | Os.17826.1.A1_at       | LOC_Os02g04690 | -1.42 | cycloartenol synthase, putative, expressed                                      |
| 188 | Os.23790.1.S1_at       | LOC_Os10g29650 | -1.43 | retrotransposon protein, putative, unclassified, expressed                      |
| 189 | Os.20355.1.S1_at       | LOC_Os01g72100 | -1.49 | OsCML10 - Calmodulin-related calcium sensor protein, expressed                  |
| 190 | Os.9311.1.S1_at        | LOC_Os03g19420 | -1.57 | nicotianamine synthase, putative, expressed                                     |
| 191 | Os.14101.3.S1_at       | LOC_Os01g61200 | -1.59 | GDSL-like lipase/acylhydrolase, putative, expressed                             |
| 192 | Os.12783.1.S1_at       | LOC_Os07g46210 | -1.66 | LTPL2 - Protease inhibitor/seed storage/LTP family protein precursor, expressed |
| 193 | Os.5816.1.S1_at        | LOC_Os09g35010 | -1.68 | dehydration-responsive element-binding protein, putative, expressed             |
| 194 | Os.50472.2.S1_s_at     | LOC_Os02g29774 | -2.16 | expressed protein                                                               |

**Supplementary Table S2.** Functional classification of the up- and down-regulated genes in *osmads57-1*.

| Probe ID               | Locus ID       | Change (Log <sub>2</sub> ratio) | Putative function                                                          |
|------------------------|----------------|---------------------------------|----------------------------------------------------------------------------|
| Transcription factor   |                |                                 |                                                                            |
| Os.10172.1.S1_at       | LOC_Os02g41510 | 1.22                            | MYB family transcription factor, putative, expressed                       |
| Os.1438.1.S1_at        | LOC_Os01g06590 | 1.35                            | zinc finger, C3HC4 type domain containing protein, expressed               |
| Os.26399.1.S1_at       | LOC_Os02g49840 | 2.99                            | OsMADS57 - MADS-box family gene with MIKC <sup>c</sup> type-box, expressed |
| Os.29987.2.S1_at       | LOC_Os05g50610 | 2.87                            | WRKY8, expressed                                                           |
| Os.4184.1.S1_at        | LOC_Os02g15350 | 1.93                            | dof zinc finger domain containing protein, putative, expressed             |
| Os.46956.1.S1_at       | LOC_Os01g50940 | 2.06                            | helix-loop-helix DNA-binding domain containing protein, expressed          |
| Os.48082.1.S1_at       | LOC_Os09g25070 | 2.58                            | WRKY62, expressed                                                          |
| Os.54232.1.S1_at       | LOC_Os05g37190 | 2.78                            | ZOS5-08 - C2H2 zinc finger protein, expressed                              |
| Os.54934.1.S1_at       | LOC_Os05g37060 | 2.55                            | MYB family transcription factor, putative, expressed                       |
| Os.55583.1.S1_at       | LOC_Os09g38110 | 1.50                            | RING-H2 finger protein, putative, expressed                                |
| Os.8920.1.S1_at        | LOC_Os07g47790 | 1.80                            | AP2 domain containing protein, expressed                                   |
| OsAffx.24166.1.S1_at   | LOC_Os02g08440 | 1.35                            | WRKY71, expressed                                                          |
| OsAffx.26540.1.S1_s_at | LOC_Os04g49550 | 1.54                            | RING-H2 finger protein ATL2A, putative, expressed                          |
| OsAffx.30784.1.S1_at   | LOC_Os11g02540 | 2.67                            | WRKY50, expressed                                                          |
| OsAffx.3357.1.S1_s_at  | LOC_Os03g28990 | 1.30                            | zinc finger family protein, putative, expressed                            |
| OsAffx.9584.1.S1_x_at  | LOC_Os01g60600 | 1.64                            | WRKY108, expressed                                                         |

| Hormone                |                |      |                                                                 |
|------------------------|----------------|------|-----------------------------------------------------------------|
| Os.10339.1.S1_at       | LOC_Os03g04770 | 1.11 | beta-amylase, putative, expressed                               |
| Os.10908.1.S1_a_at     | LOC_Os08g36910 | 2.98 | alpha-amylase precursor, putative, expressed                    |
| Os.16540.1.S1_at       | LOC_Os07g06830 | 1.70 | gibberellin receptor GID1L2, putative, expressed                |
| Os.19952.1.S1_at       | LOC_Os01g09450 | 1.06 | OsIAA2 - Auxin-responsive Aux/IAA gene family member, expressed |
| Os.30608.2.S1_x_at     | LOC_Os02g41954 | 1.73 | gibberellin 2-beta-dioxygenase 7, putative, expressed           |
| Os.54936.1.S1_at       | LOC_Os03g57640 | 2.57 | gibberellin receptor GID1L2, putative, expressed                |
| OsAffx.19635.1.S1_at   | LOC_Os12g12720 | 1.18 | jasmonate-induced protein, putative, expressed                  |
| OsAffx.21616.1.S1_s_at | LOC_Os01g54890 | 3.67 | ethylene-responsive transcription factor 2, putative, expressed |
| OsAffx.24166.1.S1_at   | LOC_Os02g08440 | 1.35 | WRKY71, expressed                                               |
| Cell division          |                |      |                                                                 |
| Os.648.1.S1_at         | LOC_Os01g43480 | 1.49 | AAA-type ATPase family protein, putative, expressed             |
| Cell wall              |                |      |                                                                 |
| Os.1191.1.S1_at        | LOC_Os03g04060 | 1.47 | CHIT16 - Chitinase family protein precursor, expressed          |
| Metabolism             |                |      |                                                                 |
| Os.10546.1.S1_s_at     | LOC_Os09g34230 | 2.16 | UDP-glucuronosyl/UDP-glucosyl transferase, putative, expressed  |
| Os.10579.1.S1_at       | LOC_Os08g02700 | 2.69 | fructose-bisphosphate aldolase isozyme, putative, expressed     |
| Os.11552.1.S1_at       | LOC_Os04g59150 | 1.36 | peroxidase precursor, putative, expressed                       |
| Os.11952.1.S1_at       | LOC_Os02g11070 | 2.07 | 3-ketoacyl-CoA synthase, putative, expressed                    |

|                      |                |       |                                                                                    |
|----------------------|----------------|-------|------------------------------------------------------------------------------------|
| Os.14616.1.S1_at     | LOC_Os07g34260 | 3.32  | chalcone and stilbene synthases, putative, expressed                               |
| Os.14631.1.S1_at     | LOC_Os07g13770 | 1.74  | UDP-glucuronosyl and UDP-glucosyl transferase domain containing protein, expressed |
| Os.24471.1.S1_at     | LOC_Os07g30760 | 1.70  | UDP-glucuronosyl and UDP-glucosyl transferase domain containing protein, expressed |
| Os.26626.1.S1_at     | LOC_Os05g33400 | 1.38  | basic 7S globulin precursor, putative, expressed                                   |
| Os.27292.1.A1_at     | LOC_Os04g44354 | 1.92  | UDP-glucuronosyl and UDP-glucosyl transferase domain containing protein, expressed |
| Os.33722.1.S1_at     | LOC_Os01g53430 | 1.14  | anthocyanidin 5,3-O-glucosyltransferase, putative, expressed                       |
| Os.48216.1.S1_at     | LOC_Os09g34250 | 3.58  | UDP-glucuronosyl and UDP-glucosyl transferase domain containing protein, expressed |
| Os.49838.1.S1_at     | LOC_Os04g47720 | 2.55  | cis-zeatin O-glucosyltransferase, putative, expressed                              |
| Os.6776.1.S1_at      | LOC_Os07g35480 | 2.45  | glucan endo-1,3-beta-glucosidase precursor, putative, expressed                    |
| Os.7985.1.S1_at      | LOC_Os03g18070 | 1.25  | omega-3 fatty acid desaturase, chloroplast precursor, putative, expressed          |
| OsAffx.26230.2.S1_at | LOC_Os02g42450 | 1.93  | RIPER1 - Ripening-related family protein precursor, expressed                      |
| OsAffx.29770.1.S1_at | LOC_Os09g08720 | 1.98  | cinnamoyl CoA reductase, putative, expressed                                       |
| Os.12783.1.S1_at     | LOC_Os07g46210 | -1.66 | LTPL2 - Protease inhibitor/seed storage/LTP family protein precursor, expressed    |
| Os.17826.1.A1_at     | LOC_Os02g04690 | -1.42 | cycloartenol synthase, putative, expressed                                         |
| Os.9311.1.S1_at      | LOC_Os03g19420 | -1.57 | nicotianamine synthase, putative, expressed                                        |
| Os.50502.1.S1_at     | LOC_Os11g27329 | -1.15 | OsSCP62 - Putative Serine                                                          |



---

|                        |                |      |                                                                |
|------------------------|----------------|------|----------------------------------------------------------------|
|                        |                |      | Carboxypeptidase homologue,<br>expressed                       |
| Os.5049.1.S1_at        | LOC_Os10g20470 | 2.32 | MATE efflux family protein,<br>putative, expressed             |
| Member related protein |                |      |                                                                |
| Os.11851.1.S1_at       | LOC_Os03g11900 | 3.35 | transporter family protein, putative,<br>expressed             |
| Os.17182.1.S1_at       | LOC_Os03g04570 | 2.13 | peptide transporter PTR3-A,<br>putative, expressed             |
| Os.22706.1.S1_at       | LOC_Os02g54760 | 1.32 | cyclic nucleotide-gated ion channel<br>14, putative, expressed |
| Os.26932.1.S1_at       | LOC_Os07g37320 | 2.44 | transporter family protein, putative,<br>expressed             |

---

**Supplementary Table S3.** Genes containing CArG box *cis*-elements in the promoter region that were up- or down-regulated in *osmads57-1* mutant plants.

| No. | Probe ID             | Locus ID       | Change (Log <sub>2</sub> ratio) | Putative function                                                          |
|-----|----------------------|----------------|---------------------------------|----------------------------------------------------------------------------|
| 1   | OsAffx.22999.1.S1_at | LOC_Os07g32710 | 5.16                            | retrotransposon protein, putative, unclassified, expressed                 |
| 2   | Os.15171.1.S1_s_at   | LOC_Os12g37260 | 4.50                            | lipoxygenase 2.1, chloroplast precursor, putative, expressed               |
| 3   | Os.6863.1.S1_s_at    | LOC_Os12g14440 | 4.09                            | Jacalin-like lectin domain containing protein, putative, expressed         |
| 4   | Os.30000.1.S1_at     | LOC_Os07g36560 | 3.70                            | transferase family protein, putative, expressed                            |
| 5   | Os.11812.1.S1_at     | LOC_Os02g48770 | 3.64                            | SAM dependent carboxyl methyltransferase, putative, expressed              |
| 6   | Os.20154.1.S1_at     | LOC_Os02g56700 | 3.51                            | dehydrogenase, putative, expressed                                         |
| 7   | Os.11851.1.S1_at     | LOC_Os03g11900 | 3.35                            | transporter family protein, putative, expressed                            |
| 8   | Os.14616.1.S1_at     | LOC_Os07g34260 | 3.32                            | chalcone and stilbene synthases, putative, expressed                       |
| 9   | Os.20420.1.S1_at     | LOC_Os01g18120 | 3.23                            | cinnamoyl CoA reductase, putative, expressed                               |
| 10  | Os.7095.1.S1_at      | LOC_Os04g49210 | 3.13                            | naringenin,2-oxoglutarate 3-dioxygenase, putative, expressed               |
| 11  | Os.26399.1.S1_at     | LOC_Os02g49840 | 2.99                            | OsMADS57 - MADS-box family gene with MIKC <sup>c</sup> type-box, expressed |
| 12  | Os.55611.1.S1_s_at   | LOC_Os11g05660 | 2.96                            | OsFBX396 - F-box domain containing protein, expressed                      |
| 13  | Os.53604.1.S1_at     | LOC_Os03g52860 | 2.91                            | lipoxygenase, putative, expressed                                          |
| 14  | Os.29987.2.S1_at     | LOC_Os05g50610 | 2.87                            | WRKY8, expressed                                                           |
| 15  | Os.46604.1.S1_s_at   | LOC_Os01g35330 | 2.83                            | circumsporozoite protein precursor, putative, expressed                    |
| 16  | Os.22935.1.S1_at     | LOC_Os05g12040 | 2.73                            | cytochrome P450 51, putative, expressed                                    |
| 17  | Os.10579.1.S1_at     | LOC_Os08g02700 | 2.69                            | fructose-bisphosphate aldolase isozyme, putative, expressed                |
| 18  | Os.44475.1.S1_x_at   | LOC_Os07g37730 | 2.69                            | NADH-ubiquinone oxidoreductase,                                            |

---

|    |                      |                |      |                                                                                   |
|----|----------------------|----------------|------|-----------------------------------------------------------------------------------|
|    |                      |                |      | mitochondrial precursor, putative, expressed                                      |
| 19 | OsAffx.30784.1.S1_at | LOC_Os11g02540 | 2.67 | WRKY50, expressed                                                                 |
| 20 | Os.487.1.S1_at       | LOC_Os01g15340 | 2.61 | flowering promoting factor-like 1, putative, expressed                            |
| 21 | Os.55961.1.S1_at     | LOC_Os07g34280 | 2.60 | CXE carboxylesterase, putative, expressed                                         |
| 22 | Os.48082.1.S1_at     | LOC_Os09g25070 | 2.58 | WRKY62, expressed                                                                 |
| 23 | Os.54936.1.S1_at     | LOC_Os03g57640 | 2.57 | gibberellin receptor GID1L2, putative, expressed                                  |
| 24 | Os.49838.1.S1_at     | LOC_Os04g47720 | 2.55 | cis-zeatin O-glucosyltransferase, putative, expressed                             |
| 25 | Os.8778.1.S1_a_at    | LOC_Os06g11290 | 2.48 | 12-oxophytodienoate reductase, putative, expressed                                |
| 26 | Os.27247.1.S1_at     | LOC_Os06g50950 | 2.47 | GDSL-like lipase/acylhydrolase, putative, expressed                               |
| 27 | Os.11417.1.S1_at     | LOC_Os02g26810 | 2.45 | cytochrome P450, putative, expressed                                              |
| 28 | Os.6776.1.S1_at      | LOC_Os07g35480 | 2.45 | glucan endo-1,3-beta-glucosidase precursor, putative, expressed                   |
| 29 | Os.50413.1.S1_at     | LOC_Os04g01690 | 2.43 | pyridoxal-dependent decarboxylase protein, putative, expressed                    |
| 30 | Os.16099.1.S1_at     | LOC_Os01g18860 | 2.42 | S-adenosylmethionine synthetase, putative, expressed                              |
| 31 | Os.467.1.S1_a_at     | LOC_Os01g42380 | 2.36 | pleiotropic drug resistance protein, putative, expressed                          |
| 32 | Os.5049.1.S1_at      | LOC_Os10g20470 | 2.32 | MATE efflux family protein, putative, expressed                                   |
| 33 | Os.9067.1.S1_at      | LOC_Os07g44140 | 2.32 | cytochrome P450 72A1, putative, expressed                                         |
| 34 | Os.21524.2.S1_x_at   | LOC_Os10g05840 | 2.30 | POEI6 - Pollen Ole e I allergen and extensin family protein precursor, expressed  |
| 35 | Os.10546.1.S1_s_at   | LOC_Os09g34230 | 2.16 | UDP-glucuronosyl/UDP-glucosyl transferase, putative, expressed                    |
| 36 | Os.4766.1.S1_at      | LOC_Os10g28350 | 2.14 | 1,2-dihydroxy-3-keto-5-methylthiopentene dioxygenase protein, putative, expressed |

---

|    |                      |                |      |                                                                                                |
|----|----------------------|----------------|------|------------------------------------------------------------------------------------------------|
| 37 | Os.7938.1.S1_at      | LOC_Os04g59190 | 2.13 | peroxidase precursor, putative, expressed                                                      |
| 38 | Os.54358.1.S1_at     | LOC_Os11g17954 | 2.12 | transposon protein, putative, Pong sub-class, expressed                                        |
| 39 | Os.10356.1.S1_at     | LOC_Os03g08320 | 2.07 | ZIM domain containing protein, putative, expressed                                             |
| 40 | Os.11952.1.S1_at     | LOC_Os02g11070 | 2.07 | 3-ketoacyl-CoA synthase, putative, expressed                                                   |
| 41 | Os.50985.1.S1_at     | LOC_Os05g36260 | 2.07 | soluble inorganic pyrophosphatase, putative, expressed                                         |
| 42 | Os.46956.1.S1_at     | LOC_Os01g50940 | 2.06 | helix-loop-helix DNA-binding domain containing protein, expressed                              |
| 43 | Os.10505.1.S1_a_at   | LOC_Os10g39010 | 2.05 | TKL_IRAK_CrRLK1L-1.16 - The CrRLK1L-1 subfamily has homology to the CrRLK1L homolog, expressed |
| 44 | Os.15917.1.S1_at     | LOC_Os04g41960 | 1.98 | NADP-dependent oxidoreductase, putative, expressed                                             |
| 45 | Os.26698.1.S1_a_at   | LOC_Os01g19820 | 1.98 | universal stress protein domain containing protein, putative, expressed                        |
| 46 | OsAffx.29770.1.S1_at | LOC_Os09g08720 | 1.98 | cinnamoyl CoA reductase, putative, expressed                                                   |
| 47 | Os.4184.1.S1_at      | LOC_Os02g15350 | 1.93 | dof zinc finger domain containing protein, putative, expressed                                 |
| 48 | OsAffx.26230.2.S1_at | LOC_Os02g42450 | 1.93 | RIPER1 - Ripening-related family protein precursor, expressed                                  |
| 49 | Os.27292.1.A1_at     | LOC_Os04g44354 | 1.92 | UDP-glucuronosyl and UDP-glucosyl transferase domain containing protein, expressed             |
| 50 | Os.6244.1.S1_x_at    | LOC_Os03g13740 | 1.85 | immediate-early fungal elicitor protein CMPG1, putative, expressed                             |
| 51 | Os.12948.1.S1_at     | LOC_Os02g08420 | 1.84 | cinnamoyl CoA reductase, putative, expressed                                                   |
| 52 | Os.15281.1.S1_x_at   | LOC_Os07g46920 | 1.76 | sex determination protein tasselseed-2, putative, expressed                                    |
| 53 | Os.14631.1.S1_at     | LOC_Os07g13770 | 1.74 | UDP-glucuronosyl and UDP-glucosyl transferase domain containing protein, expressed             |
| 54 | Os.47761.1.S1_at     | LOC_Os03g13300 | 1.74 | glutamate decarboxylase, putative, expressed                                                   |

|    |                        |                |      |                                                                                                                     |
|----|------------------------|----------------|------|---------------------------------------------------------------------------------------------------------------------|
| 55 | Os.30608.2.S1_x_at     | LOC_Os02g41954 | 1.73 | gibberellin 2-beta-dioxygenase 7, putative, expressed                                                               |
| 56 | Os.16540.1.S1_at       | LOC_Os07g06830 | 1.70 | gibberellin receptor GID1L2, putative, expressed                                                                    |
| 57 | Os.24471.1.S1_at       | LOC_Os07g30760 | 1.70 | UDP-glucuronosyl and UDP-glucosyl transferase domain containing protein, expressed                                  |
| 58 | Os.8629.1.S1_x_at      | LOC_Os12g02320 | 1.68 | LTPL12 - Protease inhibitor/seed storage/LTP family protein precursor, expressed                                    |
| 59 | Os.27170.1.S1_at       | LOC_Os01g50400 | 1.66 | STE_MEKK_ste11_MAP3K.5 - STE kinases include homologs to sterile 7, sterile 11 and sterile 20 from yeast, expressed |
| 60 | Os.48711.1.A1_at       | LOC_Os11g45990 | 1.65 | von Willebrand factor type A domain containing protein, putative, expressed                                         |
| 61 | Os.22783.1.S1_s_at     | LOC_Os05g31750 | 1.58 | annexin, putative, expressed                                                                                        |
| 62 | Os.26430.1.A1_at       | LOC_Os12g07180 | 1.58 | transposon protein, putative, Pong sub-class, expressed                                                             |
| 63 | Os.53217.1.S1_x_at     | LOC_Os03g03034 | 1.57 | flavonol synthase/flavanone 3-hydroxylase, putative, expressed                                                      |
| 64 | OsAffx.26540.1.S1_s_at | LOC_Os04g49550 | 1.54 | RING-H2 finger protein ATL2A, putative, expressed                                                                   |
| 65 | Os.27251.1.S1_at       | LOC_Os04g10350 | 1.52 | 1-aminocyclopropane-1-carboxylate oxidase homolog 2, putative, expressed                                            |
| 66 | Os.55583.1.S1_at       | LOC_Os09g38110 | 1.50 | RING-H2 finger protein, putative, expressed                                                                         |
| 67 | Os.648.1.S1_at         | LOC_Os01g43480 | 1.49 | AAA-type ATPase family protein, putative, expressed                                                                 |
| 68 | Os.4385.1.S1_at        | LOC_Os11g08210 | 1.48 | no apical meristem protein, putative, expressed                                                                     |
| 69 | Os.1191.1.S1_at        | LOC_Os03g04060 | 1.47 | CHIT16 - Chitinase family protein precursor, expressed                                                              |
| 70 | Os.50104.1.S1_at       | LOC_Os06g40180 | 1.47 | phospholipase D, putative, expressed                                                                                |
| 71 | Os.19375.1.S1_at       | LOC_Os08g34790 | 1.43 | AMP-binding domain containing protein, expressed                                                                    |
| 72 | Os.12642.1.S1_at       | LOC_Os08g42750 | 1.40 | CAMK_CAMK_like.37 - CAMK includes calcium/calmodulin dependent protein kinases, expressed                           |

|    |                       |                |       |                                                                                   |
|----|-----------------------|----------------|-------|-----------------------------------------------------------------------------------|
| 73 | Os.5045.1.S1_at       | LOC_Os01g03680 | 1.40  | BBTI8 - Bowman-Birk type bran trypsin inhibitor precursor, expressed              |
| 74 | Os.52344.1.S1_at      | LOC_Os08g26840 | 1.40  | plant protein of unknown function domain containing protein, expressed            |
| 75 | Os.26626.1.S1_at      | LOC_Os05g33400 | 1.38  | basic 7S globulin precursor, putative, expressed                                  |
| 76 | Os.11552.1.S1_at      | LOC_Os04g59150 | 1.36  | peroxidase precursor, putative, expressed                                         |
| 77 | Os.12199.1.S1_at      | LOC_Os01g66120 | 1.36  | No apical meristem protein, putative, expressed                                   |
| 78 | Os.46872.1.S1_at      | LOC_Os10g37160 | 1.35  | transposon protein, putative, unclassified, expressed                             |
| 79 | OsAffx.24166.1.S1_at  | LOC_Os02g08440 | 1.35  | WRKY71, expressed                                                                 |
| 80 | Os.22706.1.S1_at      | LOC_Os02g54760 | 1.32  | cyclic nucleotide-gated ion channel 14, putative, expressed                       |
| 81 | OsAffx.3357.1.S1_s_at | LOC_Os03g28990 | 1.30  | zinc finger family protein, putative, expressed                                   |
| 82 | Os.6452.2.A1_a_at     | LOC_Os01g43710 | 1.27  | cytochrome P450 72A1, putative, expressed                                         |
| 83 | Os.11575.4.S1_x_at    | LOC_Os01g08500 | 1.25  | transposon protein, putative, Pong sub-class, expressed                           |
| 84 | Os.7985.1.S1_at       | LOC_Os03g18070 | 1.25  | omega-3 fatty acid desaturase, chloroplast precursor, putative, expressed         |
| 85 | Os.10172.1.S1_at      | LOC_Os02g41510 | 1.22  | MYB family transcription factor, putative, expressed                              |
| 86 | OsAffx.19635.1.S1_at  | LOC_Os12g12720 | 1.18  | jasmonate-induced protein, putative, expressed                                    |
| 87 | Os.27486.1.S1_x_at    | LOC_Os11g01074 | -1.05 | RNase P subunit p30, putative, expressed                                          |
| 88 | Os.9194.1.S1_at       | LOC_Os02g52040 | -1.10 | phosphate-induced protein 1 conserved region domain containing protein, expressed |
| 89 | OsAffx.6610.1.A1_at   | LOC_Os10g08879 | -1.10 | nucleotide-sensitive chloride conductance regulator containing protein, expressed |
| 90 | Os.50487.1.S1_at      | LOC_Os03g21960 | -1.15 | aminotransferase, putative, expressed                                             |
| 91 | Os.50502.1.S1_at      | LOC_Os11g27329 | -1.15 | OsSCP62 - Putative Serine Carboxypeptidase homologue, expressed                   |
| 92 | Os.35216.1.S1_at      | LOC_Os02g34760 | -1.40 | retrotransposon protein, putative,                                                |

|    |                  |                |       |                                                                |
|----|------------------|----------------|-------|----------------------------------------------------------------|
|    |                  |                |       | unclassified, expressed                                        |
| 93 | Os.9661.1.S1_at  | LOC_Os03g04620 | -1.42 | CCT motif family protein, expressed                            |
| 94 | Os.23790.1.S1_at | LOC_Os10g29650 | -1.43 | retrotransposon protein, putative, unclassified, expressed     |
| 95 | Os.20355.1.S1_at | LOC_Os01g72100 | -1.49 | OsCML10 - Calmodulin-related calcium sensor protein, expressed |
| 96 | Os.9311.1.S1_at  | LOC_Os03g19420 | -1.57 | nicotianamine synthase, putative, expressed                    |
| 97 | Os.14101.3.S1_at | LOC_Os01g61200 | -1.59 | GDSL-like lipase/acylhydrolase, putative, expressed            |

**Supplementary Table S4.** F2 generation phenotype analysis of the double mutant (*d14osmads57-1*).

| Phenotype<br>(Tiller numbers) | Wild type<br>(10-14)              | <i>osmads57-1</i><br>(26-28)                                                                                          | <i>d14</i><br>(43-46)                                                                                                                                                     |
|-------------------------------|-----------------------------------|-----------------------------------------------------------------------------------------------------------------------|---------------------------------------------------------------------------------------------------------------------------------------------------------------------------|
| Plant numbers of<br>Genotype  | 38<br>(Dongjin,<br>Shiokari, 12)# | 13<br>( <i>OsMADS57<sup>-/-</sup>D14<sup>+/+</sup></i> )<br>and<br>( <i>OsMADS57<sup>-/-</sup>D14<sup>+/-</sup></i> ) | 17<br>( <i>OsMADS57<sup>+/+</sup>D14<sup>-/-</sup></i> ),<br>( <i>OsMADS57<sup>+/-</sup>D14<sup>-/-</sup></i> )<br>and ( <i>OsMADS57<sup>-/-</sup>D14<sup>-/-</sup></i> ) |

#The tiller numbers between the parents (Dongjin, 10.3±2.3; Shiokari 12.5±1.4) at the Sanya field, Hainan province, China, were no significant difference in the statistics.

**Supplementary Table S5.** Primer sequences used in this study.

| <b>Experiment</b>   | <b>Primer name</b> | <b>Sequence</b>                      |
|---------------------|--------------------|--------------------------------------|
| RT-PCR<br>analysis  | qMSF               | 5'GCACCAACATGAAAACACTGTGA3'          |
|                     | qMSR               | 5'CTCCCTCTGCCAAATCTTAATT3'           |
|                     | qMS1F              | 5'TTGAGCCAATCACAGCAAAGAG3'           |
|                     | qMS1R              | 5'TCGTCCAGCTTGTACGGCATAG3'           |
|                     | qD14F              | 5'CGCCTTCGTCGGCCACTC3'               |
|                     | qD14R              | 5'TCGAACCCGCCGTGGTAGTC3'             |
|                     | qD27F              | 5'-TCTGGGCTAAAGAATGAAAAGGA-3'        |
|                     | qD27R              | 5'-AGAGCTTGGGTCACAATCTCG-3'          |
|                     | qUbiF              | 5'-GCCCAAGAAGAAGATCAAGAAC-3'         |
|                     | qUbiR              | 5'-AGATAACAACGGAAGCATAAAAGTC-3'      |
|                     | qACTF              | 5'CGTATGAGCAAGGAGATCAC3'             |
|                     | qACTR              | 5'CACATCTGTTGGAAGGTGCT3'             |
|                     | Os02g49850F        | 5' TGATCGTCGGGTTCCCTCGTG 3'          |
|                     | Os02g49850R        | 5' CAGATGAAGTAGTGCGTGCC 3'           |
|                     | Os02g49860F        | 5' ACTCCTGTGCGTCAACCTCG 3'           |
|                     | Os02g49860R        | 5' GGCTGGCTTCTTGTTTCGTGT 3'          |
|                     | OsMADS57 5'F       | 5' ATGGGGAGGGGGAAGATAG 3'            |
|                     | OsMADS57 5'R       | 5' AATTTAGGCTTCTAGAAAGTTCG 3'        |
|                     | MSTF               | 5'ATGGGGAGGGGGAAGATA3'               |
|                     | MSTR               | 5' ATTCAAGACTAGGAGGCATAT3'           |
|                     | MSF                | 5' ATGGGGAGGGGGAAGATAGT 3'           |
|                     | MSR                | 5' TTAAGGCAGATGAAGTCCCAGT 3'         |
|                     | ACTINF             | 5'GAACTGGTATGGTCAAGGCTG3'            |
|                     | ACTINR             | 5'ACACGGAGCTCGTTGTAGAAG3'            |
|                     | TubulinF           | 5'TCAGATGCCAGTGACAGGA3'              |
|                     | TubulinR           | 5'TTGGTGATCTCGGCAACAGA3'             |
|                     | Mutant<br>identify | 2715-L2-LB                           |
| Ngus-RB             |                    | 5'AACGCTGATCAATTCCACAG3'             |
| M3A50432sense       |                    | 5'TGGGACTTCTTGAAGTCTGA3'             |
| 3A05432antisense1   |                    | 5'CTGAAAGGCTTTGTGCTTGTTT3'           |
| Vector<br>construct | OsMADS57OEF        | 5' CGGGATCCATGGGGAGGGGGAAGATAGT3'    |
|                     | OsMADS57OER        | 5'GGGGTACCTTAAGGCAGATGAAGTCCCAGT3'   |
|                     | OsMADS57ASF        | 5'GGGGTACCATGGGGAGGGGGAAGATAGT3'     |
|                     | OsMADS57ASR        | 5' CGGGATCCTTAAGGCAGATGAAGTCCCAGT 3' |
|                     | miR444aOEBglIIF    | 5'GAAGATCTGCAATTGGGGGCAGCAAGC3'      |
|                     | miR444aOESacIR     | 5' CGAGCTCTGGCAACAGGAGGCAGCAAG3'     |



|                                 |                   |                                                             |
|---------------------------------|-------------------|-------------------------------------------------------------|
|                                 | OsMADShoIF        | 5'CCCTCGAGATGGGGAGGGGGAAGATAGT3'                            |
|                                 | OsMADSKpnIR       | 5'GGGGTACCAGGCAGATGAAGTCCCAGTTC3'                           |
| <i>In situ</i><br>hybridization | MS1sensePF        | 5'TAATACGACTCACTATAGGGAGCCAATCACAGCAAAGAGAAG3'              |
|                                 | MS1sensePR        | 5'AAGCAATAGAGAGTAAGCAGGGTT3'                                |
|                                 | MS1antisensePF    | 5'AGCCAATCACAGCAAAGAGAAG3'                                  |
|                                 | MS1antisensePR    | 5'TAATACGACTCACTATAGGGAAGCAATAGAGAGTAAGCAGGGTT3'            |
|                                 | D14T7F            | 5'TAATACGACTCACTATAGGGGTGCTGTCGCATGGCTTC'3                  |
|                                 | D14R              | 5'GGCAGGTCGTCGACGTAGG'3                                     |
|                                 | D14F              | 5'GGTGCTGTCGCATGGCTTC'3                                     |
|                                 | D14T7R            | 5'TAATACGACTCACTATAGGGGCAGGTCGTCGACGTAGG'3                  |
|                                 | ACTINT7F          | 5'TAATACGACTCACTATAGGGGAACTGGTATGGTCAAGGCTG3'               |
|                                 | ACTINR            | 5'ACACGGAGCTCGTTGTAGAAG3'                                   |
|                                 | ACTINF            | 5'GAACTGGTATGGTCAAGGCTG3'                                   |
|                                 | ACTT7R            | 5'TAATACGACTCACTATAGGGACACGGAGCTCGTTGTAGAAG3'               |
| Yeast one<br>hybrid             | MSEcoRIsense      | 5'GGAATTCATGGGGAGGGGGAAGATAGT3'                             |
|                                 | MSBamHIantisense  | 5'CGGATCCTTAAGGCAGATGAAGTCCCAGT3'                           |
|                                 | MSNKEcoRIF        | 5'GAATTCATGGGGAGGGGGAAGATAGT3'                              |
|                                 | MSNKBamHIR        | 5'GGATCCTTAATTTAGGCTTCTAGAAAGTTTCG3'                        |
|                                 | D14pEcoRIF        | 5'CGGAATTCGAGCCACCACAGAAGATAAAG3'                           |
|                                 | D14pXhoIR         | 5'CCTCGAGCTTCAGTTATTTAGGGGGTG3'                             |
| miR444a<br>Northern<br>blotting | miR444a1 probe    | 5'GCAGCAAGCTTGAGGCAGCAA3'                                   |
|                                 | U6 probe          | 5'TGTATCGTTCCAATTTTATCGGATGT3'                              |
| EMSA                            | D14site1F         | 5'CAATAATAGCATTAAAAAGGAAGGG3'                               |
|                                 | D14site1R         | 5'CCCTTCCTTT TTAATGCTAT TATTG3'                             |
|                                 | D14site2F         | 5'AATTC AGCATTAAAA AGGAAAGCAT TAAAAAGGAAAGCATTAAAA AGGAAG3' |
|                                 | D14site2R         | 5'CTTCCTTTTTA ATGCTTTCCT TTTTAATGCT TTCCTTTTTAATGCTG3'      |
|                                 | MSEcoRIF          | 5'GAATTCATGGGGAGGGGGAAGATAGT3'                              |
|                                 | MSXhoIR           | 5'CCTCGAGTTAAGGCAGATGAAGTCCCAGT3'                           |
| Subcellular<br>localization     | MSXhoIF           | 5'CCGCTCGAGATGGGGAGGGGGAAGATAGT3'                           |
|                                 | MSBamHIR          | 5'CGGGATCCAGGCAGATGAAGTCCCAGT3'                             |
| Luciferase<br>assay             | TB1BiFCBamHIsense | 5' GGATCCATGCTTCCTTTCTTCGATT3'                              |
|                                 | TB1BiFCkantisense | 5'GGTACCGCAGTAGTGCCGCGAA3'                                  |
|                                 | D14pPstIF         | 5'AACTGCAGCCCTTGTCTAAGACCTTTATGCGTTTG3'                     |
|                                 | D14pBamHIR        | 5'CGGGATCCTCACACCAGCGGGCGGATT3'                             |
|                                 | MSNKXhoIF         | 5'CCTCGAGATGGGGAGGGGGAAGATAGT3'                             |

|                 |                          |                                                                           |
|-----------------|--------------------------|---------------------------------------------------------------------------|
|                 | MSNKKpnIR                | 5'GGTACCATTTAGGCTTCTAGAAAGTTCG3'                                          |
|                 | MADS3XbaIF               | 5'GCTCTAGA ATGATGAACATGATGACCGATC3'                                       |
|                 | MADS3KpnIR               | 5'GGGGTACC ACGTACGTGTGTACGTACGGT3'                                        |
|                 | del494-503               | 5'AAGAGAGTATAAAGGCAAAGTATCATTATGAAATTATCT<br>ATAAAGTCACATTTTATGACATTC3'   |
|                 | del494-503-antisense     | 5'GAATGTCATAAAAATGTGACTTATTAGATAATTTTCATAATG<br>ATACTTTGCCTTTATACTCTCTT3' |
|                 | del1455-1465             | 5'CGGAGACATAACCCATCAATAATAGAATGGCCATCTATCA<br>TCA3'                       |
|                 | del1455-1465-antisense   | 5'TGATGATAGATGGCCATTCTATTATTGATGGGTTATGTCTC<br>CG3'                       |
| CoIP assay      | MSNCFBamHI               | 5'CGGATCCATGGTCATGTCGCAACAA3'                                             |
|                 | MSNCRKpnI                | 5'GGGTACCTTAAGGCAGATGAAGTCCCAGT3'                                         |
|                 | OsMADS57BamHIF           | 5'CGGGATCCATGGGGAGGGGGAAGATAGT3'                                          |
|                 | OsMADS57KpnIR            | 5'GGGGTACCTTAAGGCAGATGAAGTCCCAGT3'                                        |
|                 | OsTBBamHIsense           | 5'GGATCCATGCTTCCTTTCTTCGATT 3'                                            |
|                 | OsTBKpnIantisense        | 5'GGTACCTCAG CAGTAGTGCC GCGAA3'                                           |
| Y2H assay       | TB1Esense                | 5' GAATTCATGCTTCCTTTCTTCGATTCC 3'                                         |
|                 | TB1Bantisense            | 5'GGATCCTCAGCAGTAGTGCCGCGA3'                                              |
|                 | MSNEcoRIF                | 5'GAATTCATGGGGAGGGGGAAGATAG3'                                             |
|                 | MSNBamHIR                | 5'GGATCCTTAATTTAGGCTTCTAGAAAGTTCG3'                                       |
|                 | MADSEcoRIsense           | 5'CGGAATTCATGGGGAGGGGGAAGATAGTGAT3'                                       |
|                 | MADSXhoIantisense        | 5'CCCTCGAGTTAAGGCAGATGAAGTCCCAGTTCTG3'                                    |
| RT-PCR analysis | Os08g42950.1HF           | 5'ACTGTTGAAGCACGAGATCTGC3'                                                |
|                 | Os08g42950.1HR           | 5'ACCTTATCAGGCTTCCCAT3'                                                   |
|                 | Os03g60110KHF            | 5'AGCCAAGAAATTATGCGGGT3'                                                  |
|                 | Os03g60110KHR            | 5'TTTGGCGAAGACATAGGGCTAG3'                                                |
|                 | Os01g60670RKF            | 5'TGCATTGGATTTGTCACACA3'                                                  |
|                 | Os01g60670RKR            | 5'GTAAGGTCCCATTACAGCTTGTT                                                 |
|                 | Os03g10060S2F            | 5'TTGAGATCAGAACGCACCAGCGAT3'                                              |
|                 | Os03g10060S2R            | 5'AGCTGGAGCTGCATCAAGGAATCT3'                                              |
|                 | Os04g46010.1PPRF         | 5'CCAGGTGTATGATTGGATGACA3'                                                |
|                 | Os04g46010.1PPRR         | 5'CCACGTACTTTTGAATCAGAT3'                                                 |
|                 | Os10g33900GRF7F          | 5'GCTGGGCTATTCTGGGAGTG3'                                                  |
|                 | Os10g33900GRF7R          | 5'TCTCTCGAGCACCGCCAT3'                                                    |
|                 | LOC_Os10g33900F          | 5'GGTCATTCCAAGACTCTCATG3'                                                 |
|                 | LOC_Os10g33900R          | 5'AGGGCTATGAAGGCATCAGA3'                                                  |
|                 | qD14F                    | 5'CGCCTTCGTGCGGCACTC3'                                                    |
| qD14R           | 5'TCGAACCCGCCGTGGTAGTC3' |                                                                           |

|      |                    |                                  |
|------|--------------------|----------------------------------|
|      | Os09g26460F        | 5'AAGCGCATGACATGCAGAT3'          |
|      | Os09g26460R        | 5'TGAAGATTTGCGAGGAGTACAC3'       |
|      | Os07g48620F        | 5'AGACGTGTAATCCTGTTCGAGCCAA3'    |
|      | Os07g48620R        | 5'TATGGAGATGGAGCCGCTGCAATA3'     |
|      | Os01g19940F        | 5'TCATTAATAAGGACCATGAGCG3'       |
|      | Os01g19940R        | 5'TTACTCCCTGAAAAACATGTGC3'       |
| ChIP | D14p (-2200) F     | 5'AAGAGAGTATAAAGGCCAAAGTATC3'    |
|      | D14p (-2200) R     | 5'CCAAATGGAACATAACAAAGC3'        |
|      | D14p (-1300) F     | 5'CACTAAATTGTTTGCCCAAGTAAA3'     |
|      | D14p (-1300) R     | 5'CGTAGCCCTGATGAAAAGAAT3'        |
|      | D14p (-600--500) F | 5'CGCTACATTACAGACACTAACAGCGACG3' |
|      | D14p (-600--500) R | 5'CTTCACAATCCCAACCAGAGATGC3'     |
|      | D14p(-300--1) F    | 5'GAAGCAATCACACACCTTCTCTGC3'     |
|      | D14p (-300--1) R   | 5'ATGGTCTTGACTCTTGCCCTCGCTT3'    |
|      | UBQ F              | 5'TATCCAACATGAATGCCACA3'         |
|      | UBQ R              | 5'CAGCACGAGATGAGTAAAACAA3'       |

## Supplementary Materials and Methods

### *Yeast two-hybrid assays*

Yeast two-hybrid assays were performed as described previously (Han et al, 2008). cDNA of full-length *OsMADS57* was inserted into pGBKT7 and pGADT7. Vectors encoding the N-terminus (1-168aa) and the C terminus (169-241aa) of *OsMADS57* were constructed into pGBKT7 and pGADT7. The cDNA encoding full-length *OsTB1* was inserted into the GAL4 activation domain vector pGADT7. pGBKT7-*OsMADS57* and pGADT7-*OsMADS57*, pGBKT7-*OsMADS57* and pGADT7-*OsMADS57N*, pGBKT7-*OsMADS57* and pGADT7-*OsMADS57C*, pGBKT7-*OsMADS57N* and pGADT7-*OsMADS57N*, pGBKT7-*OsMADS57C* and pGADT7-*OsMADS57C*, pGBKT7-*OsMADS57* and pGADT7-*OsTB1*, and pGBKT7-*OsMADS57* and pGADT7 were transformed into the yeast strain AH109. pGBKT7-*OsMADS57* and pGADT7, and pGBKT7 and pGADT7-*OsTB1* were used as negative controls. Positive colonies were firstly screened on synthetic dropout medium (SD/-Trp/-Leu/-His/-Ade). Then interactions were further examined by  $\beta$ -Galactosidase Assay on lift and confirmed after 3 h.

### ***Affymetrix GeneChip analyses***

The developing axillary buds from *OsMADS57* and wild-type DJ were obtained at the 30-day stage. Total RNA was isolated using a mirVana miRNA Isolation Kit (Ambion) and purified using a Qiagen kit. For microarray assays, 8 µg of total RNA were used to synthesize biotin-labeled cRNA probes. Affymetrix GeneChip assays followed the GeneChip Standard Protocol (Eukaryotic Target Preparation, Affymetrix).

To identify genes with differential expression between *OsMADS57* and wild-type DJ, a  $\log_2$ -transformed signal ratio for each gene was calculated using the R package *affy*, which is a part of Bioconductor project (<http://www.bioconductor.org>) and normalized using the RMA algorithm with  $\log_2$  ratio  $\geq 1$  (2-fold change) as a cut-off. The functional annotation added to the regulated genes was derived from the Institute for Genomic Research (TIGR) database and functional classification was performed using the GOEAST Affymetrix tool (<http://omicslab.genetics.ac.cn/GOEAST/>) and AgriGO (<http://bioinfo.cau.edu.cn/agriGO/>).

To identify *OsMADS57* targets, the reported C-A/T-A/T-A/T-A/T-A/T-A/T-A/T-A/T-G boxes (MADS protein binding *cis*-element) were used as our primary binding motif to screen using MochiView for the favorite CArG box in the region -1,500 bp from the initial translation code in all regulated genes (Homann & Johnson, 2010; Tang & Perry, 2003). The promoter sequence datasets for all regulated genes were developed using database queries according to the rice annotations in TIGR. The MEME suite was employed to identify a probable *OsMADS57* binding motif from the corresponding CArG boxes of all target gene promoters (Bailey et al, 2009).

### ***Northern blot analysis of small RNAs***

Small RNAs were extracted from 10-day-old rice seedlings using a mirVana miRNA Isolation Kit (Ambion) following the manufacturer's protocol and treated with RNase-free DNase I (MBI Fermentas) as described online. The enriched small RNAs were treated, separated in 15% polyacrylamide-urea gels, electro-transferred to Zeta-Probe membranes (Bio-Rad), and hybridized with an antisense oligonucleotide probe as described previously (Xie et al, 2003). The U6 antisense oligonucleotide probe was used as a control (Supplementary Table 4

online).

## Supplementary References

- Bailey TL, Boden M, Buske FA, Frith M, Grant CE, Clementi L, Ren J, Li WW, Noble WS (2009) MEME SUITE: tools for motif discovery and searching. *Nucleic Acids Res* **37**: W202-208
- Han Y, Cao H, Jiang J, Xu Y, Du J, Wang X, Yuan M, Wang Z, Xu Z, Chong K (2008) Rice ROOT ARCHITECTURE ASSOCIATED1 binds the proteasome subunit RPT4 and is degraded in a D-box and proteasome-dependent manner. *Plant Physiol* **148**: 843-855
- Homann OR, Johnson AD (2010) MochiView: versatile software for genome browsing and DNA motif analysis. *BMC Biol* **8**: 49
- Tang W, Perry SE (2003) Binding site selection for the plant MADS domain protein AGL15: an in vitro and in vivo study. *J Biol Chem* **278**: 28154-28159
- Xie Z, Kasschau KD, Carrington JC (2003) Negative feedback regulation of Dicer-Like1 in Arabidopsis by microRNA-guided mRNA degradation. *Curr Biol* **13**: 784-789
